# Supplementary material for: Rare Earth Doped Silica Nanoparticles via Thermolysis of a Single Source Metallasilsesquioxane Precursor
Source: PubMed Central journal article supplement (PMC5381092; doi:10.1038/srep45862), 2017-04-05
Supplement: srep45862-s1.pdf [file srep45862-s1.pdf]

# Rare Earth Doped Silica Nanoparticles *via* Thermolysis of a Single Source Metallasilsesquioxane Precursor

Gemma-Louise Davies<sup>a\*</sup>, John O'Brien<sup>b</sup>, and Yurii K. Gun'ko<sup>\*b,c</sup>

<sup>a</sup> Department of Chemistry, University of Warwick, Coventry CV4 7AL, UK.

<sup>b</sup> School of Chemistry and CRANN Institute, Trinity College Dublin, Dublin 2, Ireland.

<sup>c</sup> St. Petersburg National Research University of Information Technologies, Mechanics and Optics, 197101, St. Petersburg, Russia.

\* g-l.davies@warwick.ac.uk and igounko@tcd.ie

## Supplementary Information

### Figures and Tables

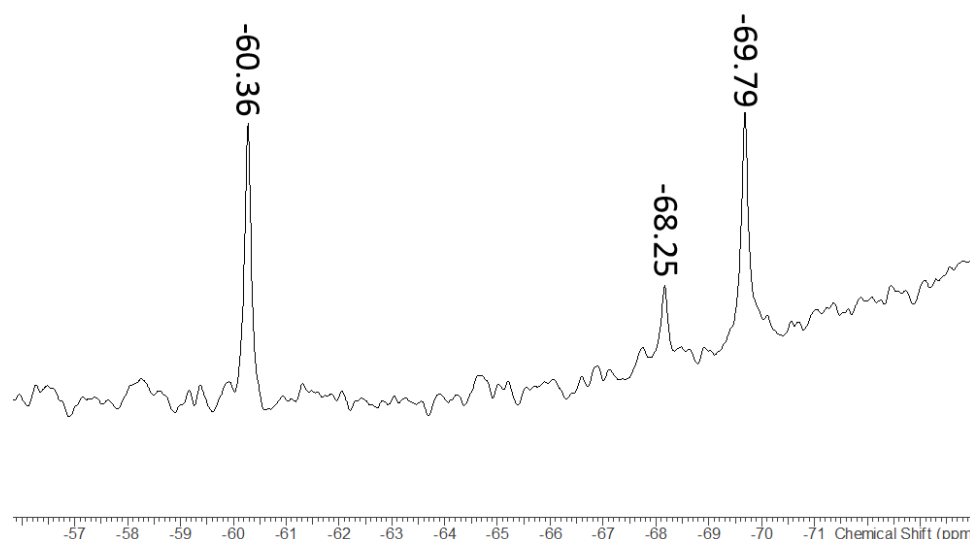

**Figure S1.** <sup>29</sup>Si NMR of  $(c\text{-C}_6\text{H}_{11})_7\text{Si}_7(\text{OH})_3$  showing peaks at -60.36, -68.25 and -69.79 ppm in a ratio of 3:1:3, representing the 3 environments of Si in the incompletely condensed trisilanol.

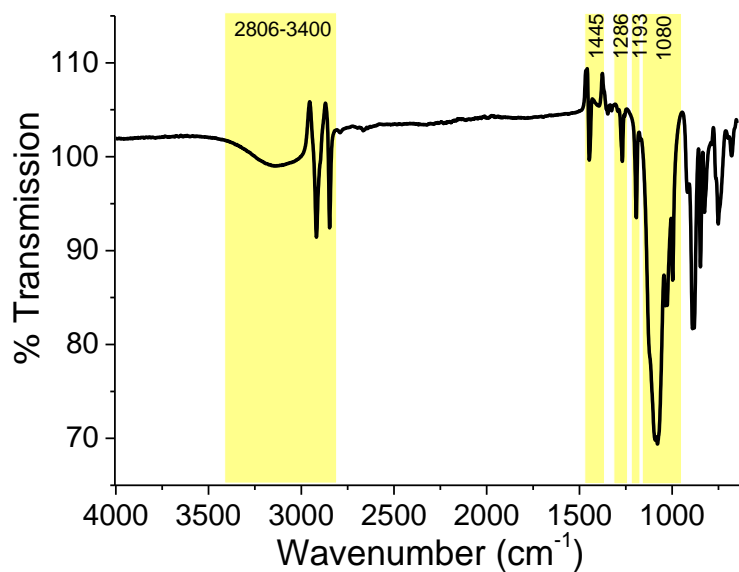

**Figure S2.** FTIR of  $(c\text{-C}_6\text{H}_{11})_7\text{Si}_7(\text{OH})_3$ .

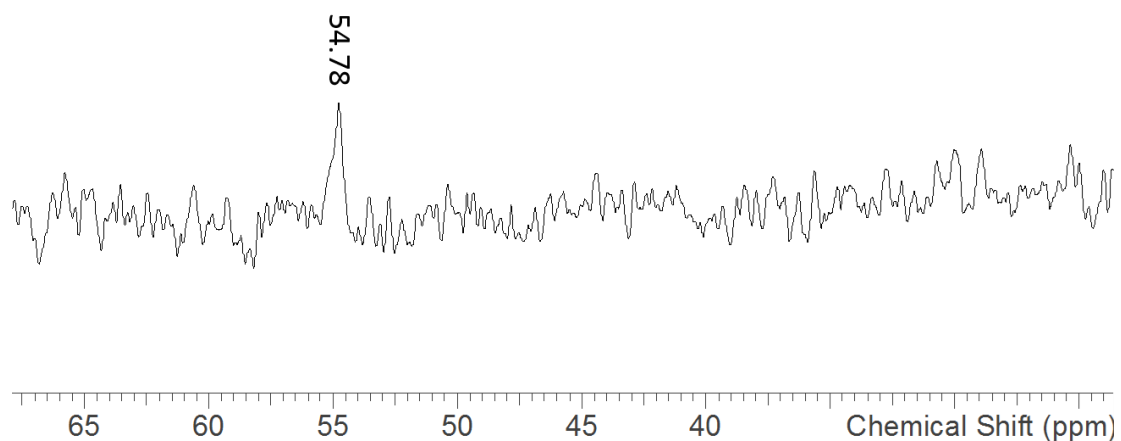

**Figure S3.**  $^{29}\text{Si}$  NMR of  $[(\text{THF})_3\text{Li}(\mu\text{-Cl})\text{Eu}[\text{N}(\text{SiMe}_3)_2]_3]$  showing a single peak at 54.78 ppm, as dictated by the symmetry of the compound.

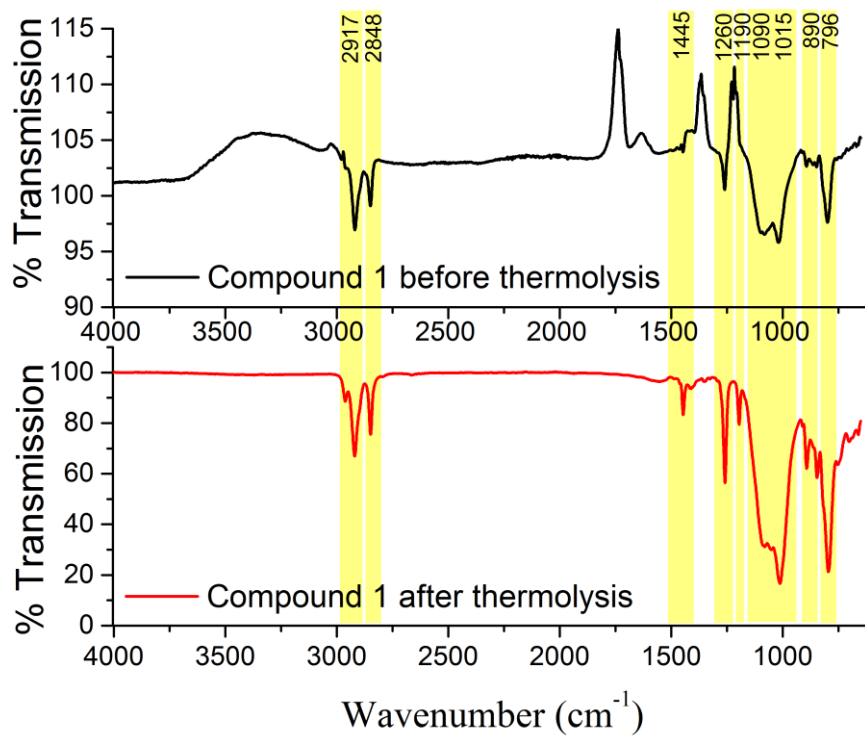

**Figure S4.** FTIR of compound 1 before and after thermolysis, as labelled.

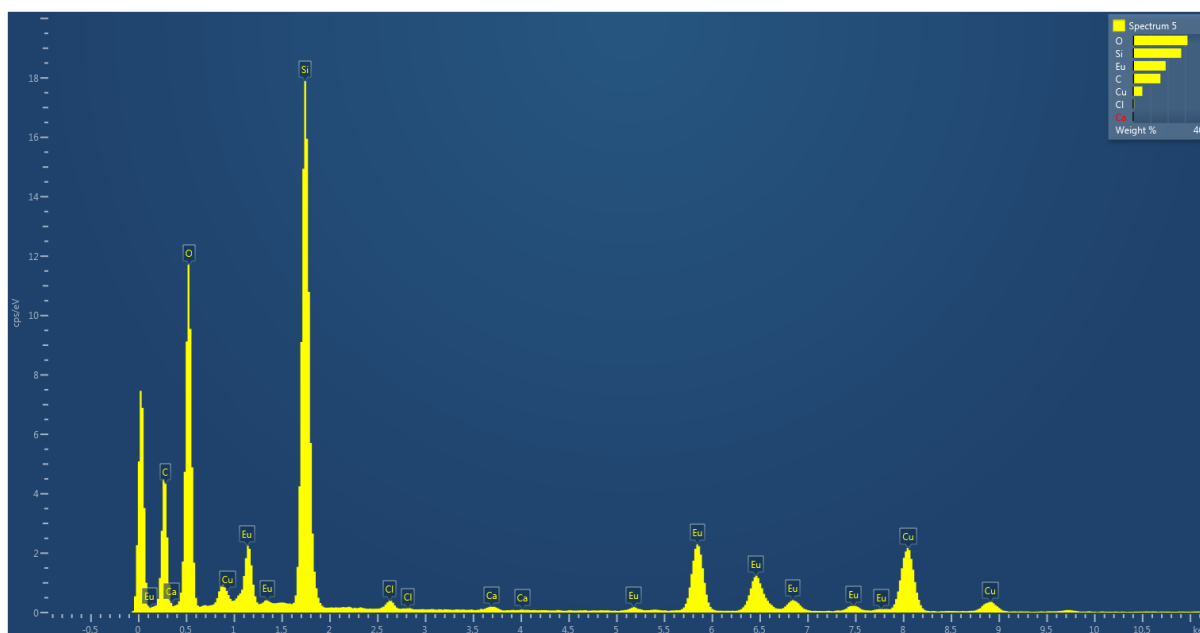

**Figure S5.** EDS spectrum showing elements present in thermolytically-prepared nanoparticles.

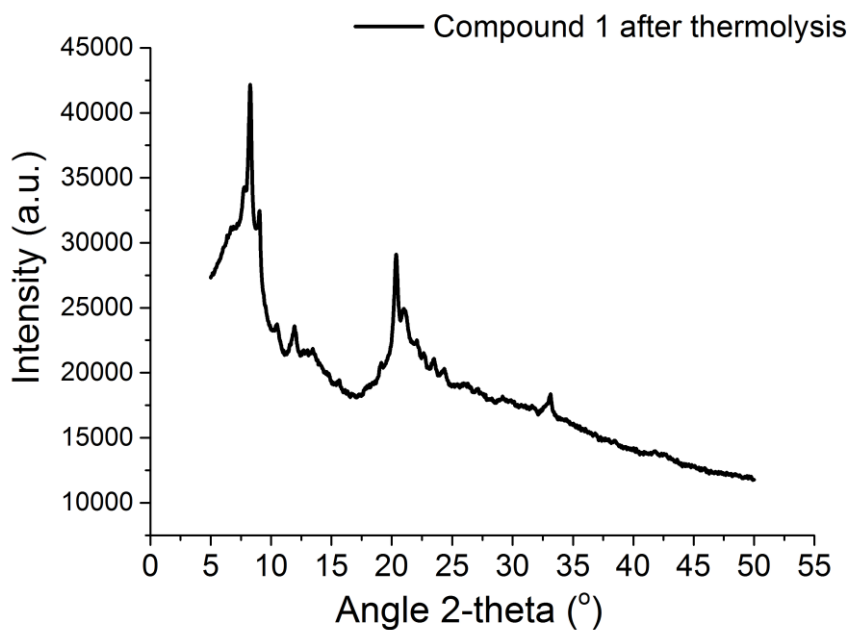

**Figure S6.** X-ray diffraction pattern of nanoparticles produced after thermolytic treatment of compound 1.

**Table S1.** Energy dispersive x-ray spectroscopy(EDS) data showing elemental composition of nanoparticles prepared by the thermolytic decomposition of compound 1.

| Element         | %Atom |
|-----------------|-------|
| C <sup>a</sup>  | 29.21 |
| O               | 43.65 |
| Si              | 22.01 |
| Cu <sup>b</sup> | 1.86  |
| Eu              | 2.75  |

<sup>a</sup> C signal comes predominantly from the carbon support film; <sup>b</sup> The presence of Cu is due to the copper grid used to support sample.
